# Supplementary material
Source: publisher site journal article supplement (https://www.dovepress.com/get_supplementary_file.php?f=282776.docx)
Supplement: Supplementary file 1 [file get_supplementary_file.php]

Supplementary Information

Assessment of undergraduate pharmacy students’ attitude towards pharmaceutical care in Pakistan: practice implications

**Supplementary Table S1: Distribution of seats in Faculty of Pharmacy, BZU, Multan, Pakistan**

| Faculty | Subject | Open merit | Seat for foreign candidates | Seat for applicants of Afghanistan | Seat for applicants of Balochistan | Seats for applicants of FATA | Seat for applicants of Azad Kashmir | Seat for applicants of tribal areas of DG khan division | Oversees Pakistani children | others | Total |
| --- | --- | --- | --- | --- | --- | --- | --- | --- | --- | --- | --- |
| Pharmacy | Pharm.D | 131 | 7+1 | 2 | 2 | 2 | 1 | 1 | 1 | 52 | 200 |

**Supplementary Table S2: Association of gender within study year with attitude by using chi-square test**

|  | | | Attitude | |  |
| --- | --- | --- | --- | --- | --- |
|  | | | Positive | Negative |  |
|  | | Gender | Frequency (percentage) | Frequency (percentage) | P-value |
| Professional Year | Third-year | Male | 53 (60.2) | 33 (63.5) | 0.70 |
| Female | 35 (39.8) | 19 (36.5) |
| Fourth-year | Male | 70 (76.1) | 38(76.0) | 0.99 |
| Female | 22 (23.9) | 12 (24.0) |
| Fifth-year | Male | 56 (66.7) | 38 (67.9) | 0.88 |
| Female | 28 (33.3) | 18 (32.1) |
